# Supplementary material for: Trifluoromethyl-substituted tetrathiafulvalenes
Source: publisher site journal article supplement (doi:10.3762/bjoc.11.73), 2015-05-06
Supplement: Additional file 1 [file 1860-5397-11-73-S1.pdf]

**Supporting Information**  
for  
**Trifluoromethyl-substituted tetrathiafulvalenes**

Olivier Jeannin, Frédéric Barrière and Marc Fourmigué\*

Address: Institut des Sciences Chimiques de Rennes, UMR 6226 CNRS-Université de Rennes I,  
Campus de Beaulieu, 35042 Rennes, France

Email: Marc Formigué - [marc.fourmigue@univ-rennes1.fr](mailto:marc.fourmigue@univ-rennes1.fr)

\* Corresponding author

**Optimized geometries of the model molecules TTF, TTF–CN, TTF–CF<sub>3</sub> and  
TTF–CO<sub>2</sub>Me and results of the TD-DFT calculations**

## TTF

### Optimized geometry

|   |   |          |          |          |
|---|---|----------|----------|----------|
| C | 0 | 0.04201  | 0.05705  | 0.00807  |
| C | 0 | 0.04248  | 0.05622  | 1.34516  |
| S | 0 | 1.58895  | -0.12695 | 2.17271  |
| C | 0 | 2.56465  | -0.0755  | 0.67564  |
| S | 0 | 1.58789  | -0.12511 | -0.8208  |
| C | 0 | 3.91307  | -0.01055 | 0.6752   |
| S | 0 | 4.89017  | 0.03206  | 2.17163  |
| C | 0 | 6.41134  | 0.36298  | 1.34309  |
| C | 0 | 6.41086  | 0.36381  | 0.006    |
| S | 0 | 4.88911  | 0.0339   | -0.82187 |
| H | 0 | -0.84376 | 0.14133  | -0.61065 |
| H | 0 | -0.84285 | 0.13974  | 1.96461  |
| H | 0 | 7.28494  | 0.53122  | 1.96197  |
| H | 0 | 7.28403  | 0.53281  | -0.61329 |

### TD-DFT calculations

Excitation energies and oscillator strengths:

Excited State 1: Singlet-A 2.7062 eV 458.14 nm f=0.0000  
52 -> 53 0.69382

This state for optimization and/or second-order correction.

Copying the excited state density for this state as the 1-particle RhoCI density.

Excited State 2: Singlet-A 3.4293 eV 361.54 nm f=0.0179  
52 -> 54 0.65004  
52 -> 57 -0.23097

Excited State 3: Singlet-A 3.8998 eV 317.93 nm f=0.0147  
51 -> 53 0.19439  
52 -> 56 0.32967  
52 -> 58 0.57776

Excited State 4: Singlet-A 3.9193 eV 316.34 nm f=0.0000  
52 -> 55 0.68308

Excited State 5: Singlet-A 3.9232 eV 316.02 nm f=0.0276  
52 -> 54 0.21966  
52 -> 57 0.65123

## TTF-CF<sub>3</sub>

### Optimized geometry

|   |   |          |          |          |
|---|---|----------|----------|----------|
| C | 0 | -1.75661 | 1.51707  | 0.05699  |
| C | 0 | -2.06113 | 0.21559  | -0.03132 |
| C | 0 | -3.43852 | -0.33843 | 0.16339  |
| S | 0 | -0.08714 | 1.99161  | -0.19127 |
| S | 0 | -0.75097 | -0.91681 | -0.417   |
| F | 0 | -3.78506 | -1.15792 | -0.85356 |
| F | 0 | -4.35498 | 0.64756  | 0.23369  |
| F | 0 | -3.53186 | -1.06354 | 1.29804  |
| C | 0 | 0.52926  | 0.3122   | -0.21917 |
| S | 0 | 2.45119  | -1.67257 | -0.14101 |
| C | 0 | 1.83954  | 0.00421  | -0.11542 |
| S | 0 | 3.12258  | 1.23432  | 0.05327  |
| C | 0 | 4.39363  | 0.06659  | 0.41728  |
| C | 0 | 4.09336  | -1.23322 | 0.32951  |
| H | 0 | -2.48165 | 2.2981   | 0.25034  |
| H | 0 | 5.36979  | 0.46231  | 0.67196  |
| H | 0 | 4.79123  | -2.04399 | 0.50282  |

### TD-DFT calculations

Excitation energies and oscillator strengths:

Excited State 1: Singlet-A 2.7637 eV 448.62 nm f=0.0009  
68 -> 69 0.69257

This state for optimization and/or second-order correction.

Copying the excited state density for this state as the 1-particle RhoCI density.

Excited State 2: Singlet-A 3.2003 eV 387.41 nm f=0.0203  
68 -> 70 0.67392  
68 -> 73 0.11717

Excited State 3: Singlet-A 3.8349 eV 323.30 nm f=0.0014  
68 -> 70 0.10970  
68 -> 71 0.57886  
68 -> 72 -0.17355  
68 -> 73 -0.30536

Excited State 4: Singlet-A 3.9706 eV 312.25 nm f=0.0337  
67 -> 69 -0.21361  
68 -> 71 0.14081  
68 -> 72 0.35061  
68 -> 73 0.16073  
68 -> 74 0.51165

Excited State 5: Singlet-A 4.1038 eV 302.12 nm f=0.0270  
68 -> 71 0.28553  
68 -> 72 -0.12653  
68 -> 73 0.58092  
68 -> 74 -0.16251

## TTF-CN

### Optimized geometry

|   |   |          |          |          |
|---|---|----------|----------|----------|
| C | 0 | 0.07531  | 0.09509  | -0.00462 |
| C | 0 | 0.071    | 0.13686  | 1.33152  |
| S | 0 | 1.60022  | -0.12576 | 2.17057  |
| C | 0 | 2.5799   | -0.1651  | 0.67923  |
| S | 0 | 1.60931  | -0.21778 | -0.81687 |
| C | 0 | 3.93025  | -0.16196 | 0.6801   |
| S | 0 | 4.90341  | -0.09722 | 2.1803   |
| C | 0 | 6.3897   | 0.31961  | 1.36616  |
| C | 0 | 6.41355  | 0.27887  | 0.01707  |
| S | 0 | 4.91225  | -0.22395 | -0.8091  |
| C | 0 | 7.56162  | 0.56263  | -0.76731 |
| N | 0 | 8.49506  | 0.79023  | -1.42555 |
| H | 0 | -0.80022 | 0.21542  | -0.63173 |
| H | 0 | -0.80803 | 0.29565  | 1.94498  |
| H | 0 | 7.24951  | 0.56959  | 1.97668  |

### TD-DFT calculations

Excitation energies and oscillator strengths:

```
Excited State 1: Singlet-A      2.7043 eV  458.46 nm  f=0.0018
  58 -> 59      0.14392
  58 -> 60      0.67513
```

This state for optimization and/or second-order correction.

Copying the excited state density for this state as the 1-particle RhoCI density.

```
Excited State 2: Singlet-A      2.7392 eV  452.63 nm  f=0.0263
  58 -> 59      0.66354
  58 -> 60     -0.14505
```

```
Excited State 3: Singlet-A      3.7153 eV  333.71 nm  f=0.0000
  58 -> 61      0.59940
  58 -> 63      0.32388
```

```
Excited State 4: Singlet-A      3.9499 eV  313.89 nm  f=0.0444
  57 -> 60      0.23427
  58 -> 62     -0.41278
  58 -> 63     -0.10919
  58 -> 64      0.45433
  58 -> 65     -0.14349
```

```
Excited State 5: Singlet-A      4.0841 eV  303.58 nm  f=0.0212
  58 -> 61     -0.30085
  58 -> 63      0.57610
  58 -> 64      0.18685
```

## TTF-CO<sub>2</sub>Me

### Optimized geometry

|   |   |          |          |          |
|---|---|----------|----------|----------|
| C | 0 | -0.30472 | 2.52951  | 1.5161   |
| C | 0 | 0.76005  | 2.00396  | 0.88184  |
| C | 0 | 2.13014  | 2.49984  | 1.12797  |
| S | 0 | -1.88951 | 1.91514  | 1.13911  |
| S | 0 | 0.44961  | 0.72175  | -0.30801 |
| O | 0 | 2.41381  | 3.37973  | 1.91607  |
| O | 0 | 3.02908  | 1.84974  | 0.35823  |
| C | 0 | 4.39595  | 2.2647   | 0.51895  |
| C | 0 | -1.29601 | 0.61472  | 0.0607   |
| S | 0 | -1.50985 | -1.65913 | -1.49358 |
| C | 0 | -2.10008 | -0.35446 | -0.42536 |
| S | 0 | -3.84831 | -0.45319 | -0.06844 |
| C | 0 | -4.06052 | -2.03785 | -0.81299 |
| C | 0 | -3.01569 | -2.57581 | -1.45047 |
| H | 0 | -0.21764 | 3.33445  | 2.2367   |
| H | 0 | 4.72112  | 2.11133  | 1.55101  |
| H | 0 | 4.50595  | 3.3213   | 0.26187  |
| H | 0 | 4.97138  | 1.6398   | -0.1639  |
| H | 0 | -5.04098 | -2.49279 | -0.73527 |
| H | 0 | -3.02815 | -3.53028 | -1.96355 |

### TD-DFT calculations

Excitation energies and oscillator strengths:

Excited State 1: Singlet-A 2.6315 eV 471.16 nm f=0.0390  
67 -> 68 0.67844

This state for optimization and/or second-order correction.

Copying the excited state density for this state as the 1-particle RhoCI density.

Excited State 2: Singlet-A 2.7502 eV 450.83 nm f=0.0001  
67 -> 69 0.69394

Excited State 3: Singlet-A 3.6607 eV 338.69 nm f=0.0027  
67 -> 70 0.59596  
67 -> 72 -0.33253

Excited State 4: Singlet-A 3.9442 eV 314.35 nm f=0.0189  
66 -> 69 -0.14978  
67 -> 70 0.25124  
67 -> 71 0.25532  
67 -> 72 0.48644  
67 -> 73 -0.29687

Excited State 5: Singlet-A 4.0397 eV 306.91 nm f=0.0216  
66 -> 69 0.14195  
67 -> 70 0.22206  
67 -> 71 -0.18993  
67 -> 72 0.32929  
67 -> 73 0.50892
